# Supplementary material for: Genome-Wide Analysis of MicroRNAs in Relation to Pupariation in Oriental Fruit Fly
Source: PubMed Central journal article supplement (PMC6439999; doi:10.3389/fphys.2019.00301), 2019-03-22
Supplement: Image_2.pdf [file Image_2.pdf]

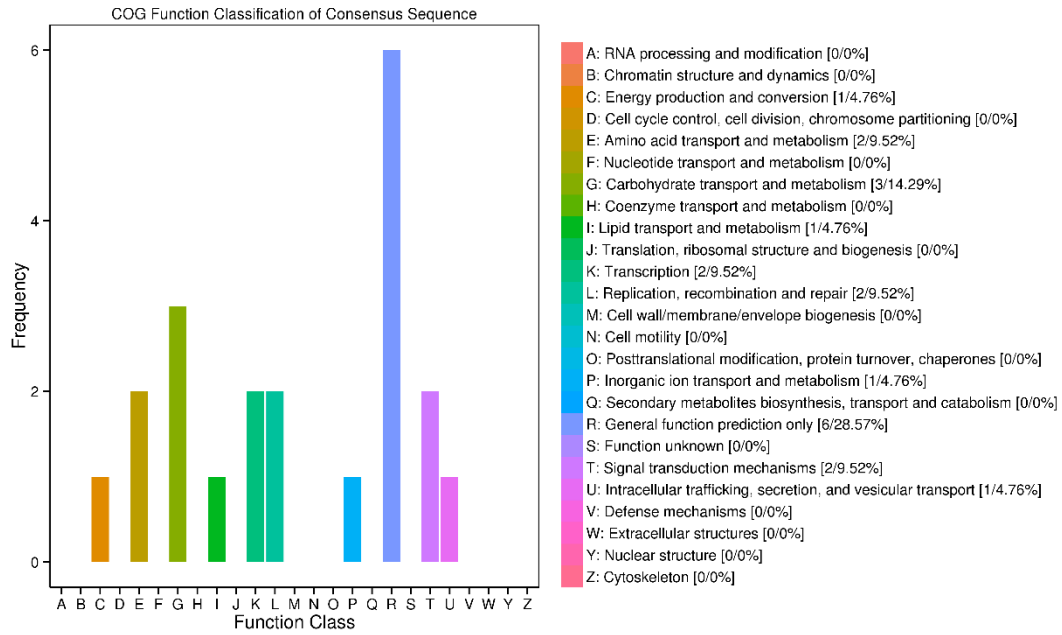

Figure S2. COG classification analysis for predicted differentially expressed genes (DEGs) of differentially expressed miRNAs (DEMs) in WS vs. LWS.
