# Supplementary material for: Genome-Wide Analysis of MicroRNAs in Relation to Pupariation in Oriental Fruit Fly
Source: Front Physiol. 2019 Mar 22;10:301. doi: 10.3389/fphys.2019.00301 (PMC6439999; doi:10.3389/fphys.2019.00301)
Supplement: TABLE S1 — Primers of miRNA and mRNA used in our study. [file Table_1.xlsx]

## Sheet: 1
Table S1. Primers of miRNA and mRNA used in our study.
miRNA	Forward primer (5'-3')			mRNA	Forward primer (5'-3')	Reverse primer (5'-3')
let-7-3p	GCCTATACAACGTGCTAGCTTTCT			lap	ACCACAGATTATGCGTGCCA	CTGCCCGGTTCTTTTGTAGC
miR-981	GTTGTCGACGAAACCTGCA			pdpc	AGTGCACCAAGTCGACCAAA	GACGGTAGAGTGTGAGAGCG
novel-mir-55	ATCTGGTAGACTTTTGGTCCGGC			chit3	AAGTCTTTGACGTGCCCGAT	ATAGCCGAATTGCTCGCGTA
novel-mir-44	CAACGACCATACCACGCTGA			cac	AACTGAGTTCCGTCGTGGTC	GTACGTGTCTTCTCGGGGAC
novel-mir-24	GGTCCGTCATATGGCAATCTAAC			psB/C	CATCGGATCCGGGCGATAAA	TCTGTATGGGTGTCTCGGGT
U6	CGATACAGAGAAGATTAGCATGG			ipc	ATGGCGACACATTGTGCTTC	GGCTGCCCTTCTCCAAGAAA
				sp1/2	TGACGGATCCGGTCTTAACG	GCCAAAGCTCACGATACCCA
				spsX1	CAACGTCTTTCTCCGCCTCT	CTCAGTCGTCATGTGCCAGT
