# Supplementary material for: Genome-Wide Analysis of MicroRNAs in Relation to Pupariation in Oriental Fruit Fly
Source: Front Physiol. 2019 Mar 22;10:301. doi: 10.3389/fphys.2019.00301 (PMC6439999; doi:10.3389/fphys.2019.00301)
Supplement: TABLE S5 — List of differentially expressed miRNAs in WS vs. LWS and LWS vs. WPS of Bactrocera dorsalis. [file Table_5.xlsx]

## Sheet: WS vs. LWS
Table S5. List of differentially expressed miRNAs in WS vs. LWS and LWS vs. WPS of Bactrocera dorsalis.
#ID	name	S01	S02	S03	S04	S05	S06	PValue	FDR	log2FC	regulated
conservative_NW_011876287.1_218873	tca-miR-252b-3p	6.18	2.23	5.19	11.68	20.57	1.26	0.140156	0.997199	1.14263	up
conservative_NW_011876172.1_151459	rno-miR-664-1-5p	0.31	0.25	0.99	1.82	1.82	0	0.423893	0.997199	1.16557	up
conservative_NW_011876310.1_242253	oan-miR-1421x-3p	0.62	0.5	0	0.78	2.42	1.26	0.199651	0.997199	1.62286	up
conservative_NW_011876373.1_355971	mmu-miR-7673-5p	0	0	0.99	0	1.21	5.04	0.252794	0.997199	2.05051	up
conservative_NW_011876355.1_316796	mmu-miR-380-3p	0	0.25	0	0	3.03	0	0.356656	0.997199	2.75818	up
conservative_NW_011875989.1_106248	mmu-miR-196a-2-3p	0	0.25	0	1.04	0	0	0.716974	1	1.82324	up
conservative_NW_011875159.1_47430	mml-miR-7198-5p	0.31	0	0	0.26	1.21	0	0.698292	1	1.86177	up
conservative_NW_011876195.1_158917	mdo-miR-7264-3p	0	0.25	0.74	0	1.21	2.52	0.558049	1	1.19628	up
conservative_NW_011876343.1_291701	hsa-miR-6756-5p	0	0	0	0	0.61	1.26	0.307375	0.997199	3.23485	up
conservative_NW_011876389.1_404773	hsa-miR-548s	3.09	8.69	9.14	6.75	5.45	100.88	0.0265137	0.685166	2.15196	up
conservative_NW_011876341.1_288685	hsa-miR-4474-3p	0	0.74	0.74	1.56	2.42	0	0.424935	0.997199	1.22026	up
conservative_NW_011876332.1_271541	hsa-miR-3937	0.62	0	0	0.26	1.21	2.52	0.15775	0.997199	2.13895	up
conservative_NW_011876204.1_163454	hsa-miR-219a-1-3p	0	0	0.25	0.52	0	0	1	1	1.13769	up
conservative_NW_011876026.1_112425	hsa-miR-1290	0.62	6.21	0.99	2.34	1.21	23.96	0.210077	0.997199	1.3988	up
conservative_NW_011875940.1_100350	hsa-miR-1261	0	0	0	0.78	1.21	0	0.125382	0.997199	4.09397	up
conservative_NW_011876391.1_414341	hsa-let-7a-3p	13.91	6.45	5.43	106.94	88.94	104.67	1.01688e-08	3.0913e-06	3.35171	up
conservative_NW_011876359.1_323313	gga-miR-21-3p	1.24	0.25	0.25	1.04	3.03	0	0.446759	0.997199	1.13558	up
conservative_NW_011874201.1_28013	gga-miR-199-3p	2.47	2.23	3.21	2.6	3.63	15.13	0.169252	0.997199	1.02661	up
conservative_NW_011875538.1_63967	gga-miR-1780	0.31	0	0	0.78	1.21	0	0.330158	0.997199	2.40721	up
conservative_NW_011875909.1_96112	dre-miR-19a-5p	0	0	0	0.52	1.21	0	0.198733	0.997199	3.85301	up
conservative_NW_011876352.1_311613	dps-miR-2548-3p	0	1.24	0.74	2.86	2.42	1.26	0.165436	0.997199	1.47	up
conservative_NW_011876347.1_301170	dme-miR-9a-5p	0.31	1.99	0.25	2.34	4.84	1.26	0.15695	0.997199	1.41397	up
conservative_NW_011876326.1_261625	dme-miR-308-5p	5.25	1.49	4.2	13.24	1.82	20.18	0.0647935	0.996711	1.48248	up
conservative_NW_011875837.1_88950	dme-miR-2a-1-5p	0.31	0.25	0	0.26	1.21	0	0.686993	1	1.10071	up
conservative_NW_011876400.1_468415	dme-miR-282-5p	287.78	247.27	303.98	773.01	801.63	1001.28	0.00361142	0.190828	1.39599	up
conservative_NW_011876367.1_338524	crm-miR-64b-3p	0	0	0	0	1.21	0	0.571809	1	3.17772	up
conservative_NW_011875660.1_72234	cin-miR-4131-5p	0	0.5	0.25	0	0	3.78	0.469077	0.997199	1.52949	up
conservative_NW_011876400.1_466327	cel-miR-8207-3p	0.31	0	0	0.78	0	0	1	1	1.50356	up
conservative_NW_011876162.1_147519	cel-miR-4805-3p	0	0	0.25	0.26	0.61	0	1	1	1.29963	up
conservative_NW_011869893.1_2118	cel-miR-358-3p	0.62	0.74	0	1.82	1.21	0	0.545462	1	1.15008	up
conservative_NW_011876381.1_381063	cel-miR-2-3p	23.49	11.92	23.21	30.11	10.29	141.24	0.0670428	0.996711	1.43157	up
conservative_NW_011876391.1_414344	cel-lin-4-5p	4.95	3.48	4.94	31.15	24.81	20.18	5.63797e-05	0.00571315	2.3062	up
conservative_NW_011876179.1_153420	bta-miR-3431	0.62	0.99	0.49	2.08	3.03	1.26	0.173709	0.997199	1.36241	up
conservative_NW_011876360.1_325492	bmo-miR-2839-5p	0	0	0	0.78	3.63	0	0.0368919	0.801082	5.04191	up
conservative_NW_011876328.1_265295	bfl-miR-4886	0	0	0	0.26	1.82	0	0.237855	0.997199	3.98857	up
unconservative_NW_011876400.1_464203	Bdo-novel-mir-62	0.31	0	0.49	2.08	1.82	0	0.137087	0.997199	2.15092	up
unconservative_NW_011876355.1_315818	Bdo-novel-mir-44	7.11	17.63	28.15	21.03	87.73	52.96	0.0491419	0.878773	1.32372	up
unconservative_NW_011876330.1_269137	Bdo-novel-mir-40	0.31	0	0.99	0.78	1.82	1.26	0.277809	0.997199	1.17597	up
unconservative_NW_011876290.1_221194	Bdo-novel-mir-30	1.55	2.23	2.96	3.89	15.73	0	0.17324	0.997199	1.29302	up
unconservative_NW_011876249.1_188539	Bdo-novel-mir-24	605.85	464	598.82	1407.67	1073.28	1677.21	0.0252317	0.685166	1.10646	up
unconservative_NW_011872882.1_16282	Bdo-novel-mir-2	0.31	1.49	1.48	6.49	2.42	0	0.242995	0.997199	1.33869	up
conservative_NW_011876326.1_262290	bdo-mir-100	0	0	0	0.78	0	3.78	0.0588607	0.994091	4.83409	up
conservative_NW_011876308.1_239720	tca-miR-3896-3p	1.85	0	0.74	0.26	0.61	0	0.359995	0.997199	-1.42917	down
conservative_NW_011876286.1_217385	ssa-miR-106a-3p	0	0.25	0	0	0	0	1	1	-1.68855	down
conservative_NW_011876374.1_358338	prd-miR-7896-5p	0	0.99	0.25	0	0	0	0.255506	0.997199	-3.59517	down
conservative_NW_011876354.1_315596	ppc-miR-8340-5p	1.24	0.5	0	0.26	0	0	0.366582	0.997199	-1.85662	down
conservative_NW_011875220.1_48959	ppc-miR-8338-2-3p	5.87	5.96	4.69	2.34	3.63	2.52	0.0816455	0.996711	-1.19997	down
conservative_NW_011876237.1_181751	ppc-miR-8264-5p	0	0.99	0	0.26	0	0	0.744555	1	-1.37853	down
conservative_NW_011875962.1_103568	pma-miR-4582	1.55	0.5	1.73	0.26	0	0	0.0476885	0.878773	-2.90841	down
conservative_NW_011876327.1_263597	oan-miR-7415-5p	0.93	1.49	0	0.52	0.61	0	0.51761	1	-1.01547	down
conservative_NW_011876139.1_140353	oan-miR-590-3p	0.93	0	0	0.26	0	0	1	1	-1.00116	down
conservative_NW_011876396.1_436970	nve-miR-9468	1.55	0	0	0	0	0	0.326748	0.997199	-3.64122	down
conservative_NW_011876255.1_193282	mmu-miR-881-3p	1.85	3.23	2.22	0.78	0	1.26	0.0359142	0.801082	-2.12732	down
conservative_NW_011875304.1_52410	mmu-miR-7026-3p	0	0	0.49	0	0	0	1	1	-2.38654	down
conservative_NW_011876394.1_424800	mmu-miR-6929-3p	0	2.98	0.49	0.26	0	1.26	0.385594	0.997199	-1.8714	down
conservative_NW_011876198.1_160822	hsa-miR-6085	0.31	0.5	0	0	0	0	0.543073	1	-2.94637	down
conservative_NW_011875987.1_105943	hsa-miR-412-3p	0	0.74	0.25	0.26	0	0	0.703625	1	-1.28924	down
conservative_NW_011876380.1_378364	hsa-miR-1178-3p	0	1.49	0	0	0.61	0	0.465096	0.997199	-1.54207	down
conservative_NW_011876386.1_397021	hhi-miR-723	0	2.48	0.25	0	0	1.26	0.523711	1	-2.07647	down
conservative_NW_011876075.1_122839	gga-miR-6711-5p	0.62	0.74	0.49	0.26	0	0	0.298018	0.997199	-1.9743	down
conservative_NW_011875560.1_65178	dps-miR-2550-5p	0.31	1.99	0.49	0.52	0	0	0.142663	0.997199	-1.89262	down
conservative_NW_011876384.1_391387	dme-miR-929-5p	8.96	4.97	6.17	3.89	5.45	0	0.0836626	0.996711	-1.13339	down
conservative_NW_011876347.1_301167	dme-miR-5-5p	7.42	3.72	2.96	1.3	3.03	0	0.027046	0.685166	-1.72792	down
conservative_NW_011876345.1_297217	crm-miR-7600	0.62	0	0	0	0	0	0.572611	1	-2.46216	down
conservative_NW_011876058.1_118061	crm-miR-72-3p	2.78	1.49	1.48	0.78	0	0	0.0119901	0.404998	-2.20387	down
conservative_NW_011876346.1_299924	cin-miR-4143-3p	0.31	0	2.47	0	0	0	0.0947603	0.996711	-4.57466	down
conservative_NW_011876397.1_442986	cin-miR-4104-5p	0.31	0	0.99	0	0	0	0.240773	0.997199	-3.5379	down
conservative_NW_011873581.1_21531	cin-miR-183-3p	0.62	1.74	0.25	0.26	0.61	0	0.261354	0.997199	-1.58839	down
conservative_NW_011876036.1_113843	cbr-miR-252	3.4	7.94	4.69	2.08	1.21	0	0.00376634	0.190828	-2.1503	down
conservative_NW_011876350.1_306470	bta-miR-2310	0	0	1.23	0	0	0	0.318071	0.997199	-3.50066	down
conservative_NW_011876301.1_233724	bmo-miR-3422	0.62	1.49	0.49	0.26	0	1.26	0.389714	0.997199	-1.46063	down
unconservative_NW_011874955.1_41571	Bdo-novel-mir-7	1.24	0.5	0	0	0	0	0.150994	0.997199	-3.86925	down
unconservative_NW_011876400.1_468341	Bdo-novel-mir-65	2.16	0	1.23	0	0	1.26	0.368232	0.997199	-2.32431	down
unconservative_NW_011874899.1_39989	Bdo-novel-mir-6	1.24	0.74	1.23	0	1.82	0	0.438638	0.997199	-1.09563	down
unconservative_NW_011876398.1_449265	Bdo-novel-mir-59	0.31	0.99	3.46	0.52	0.61	0	0.100589	0.996711	-1.94963	down
unconservative_NW_011876392.1_418147	Bdo-novel-mir-56	0.62	1.74	1.98	0.52	1.21	0	0.190014	0.997199	-1.3819	down
unconservative_NW_011876390.1_408174	Bdo-novel-mir-55	364.75	4479.34	280.52	25.44	74.42	694.84	0.00981556	0.372991	-3.02239	down
unconservative_NW_011876386.1_396674	Bdo-novel-mir-52	0.62	0.25	0.25	0	0	0	0.303429	0.997199	-3.30072	down
unconservative_NW_011876380.1_377793	Bdo-novel-mir-50	0	0	0.25	0	0	0	1	1	-1.6527	down
unconservative_NW_011876360.1_326254	Bdo-novel-mir-46	1.24	3.23	1.48	0.78	0	1.26	0.101638	0.996711	-1.85559	down
unconservative_NW_011876352.1_310760	Bdo-novel-mir-42	3.4	4.22	5.43	1.04	1.21	1.26	0.00705872	0.30655	-2.13896	down
unconservative_NW_011873734.1_23020	Bdo-novel-mir-4	0.93	0	1.73	0.52	0	0	0.211202	0.997199	-1.72801	down
unconservative_NW_011876262.1_198763	Bdo-novel-mir-26	1.24	0.99	0.49	0	1.21	0	0.378663	0.997199	-1.42967	down
unconservative_NW_011876258.1_195155	Bdo-novel-mir-25	0.62	1.74	1.98	0.52	1.21	0	0.189206	0.997199	-1.38187	down
unconservative_NW_011876230.1_176538	Bdo-novel-mir-23	1.55	5.21	1.73	2.86	0.61	0	0.145251	0.997199	-1.15841	down
unconservative_NW_011876163.1_148000	Bdo-novel-mir-19	1.55	0	0	0	0	0	0.323325	0.997199	-3.64096	down
conservative_NW_011876123.1_134749	bdo-miR-981	1799.32	355.26	614.62	845.176	807.68	314.004	0.0490156	0.997199	-1.21005	down
conservative_NW_011876380.1_378962	ame-miR-3799	0	0.99	0.25	0	0	0	0.254942	0.997199	-3.59515	down
conservative_NW_011876222.1_171030	aga-miR-1891	2.16	1.74	2.47	0.26	0	0	0.00132162	0.100443	-3.64674	down

## Sheet: LWS vs. WPS
Table S5. List of differentially expressed miRNAs in WS vs. LWS and LWS vs. WPS of Bactrocera dorsalis.
#ID	name	S04	S05	S06	S07	S08	S09	PValue	FDR	log2FC	regulated
conservative_NW_011876391.1_414341	hsa-let-7a-3p	106.94	88.94	104.67	185.07	227.31	206.85	0.0144088	1	1.19706	up
conservative_NW_011876391.1_414340	bdo-mir-100	53.21	35.7	56.75	121.11	85.83	59.19	0.059743	1	1.07598	up
unconservative_NW_011876390.1_408174	Bdo-novel-mir-55	25.44	74.42	694.84	63.28	532.91	1301.58	0.225568	1	1.23949	up
unconservative_NW_011876400.1_464829	Bdo-novel-mir-64	2.86	3.63	1.26	6.12	8.98	7	0.0163042	1	1.5603	up
conservative_NW_011876338.1_282204	dme-miR-iab-8-5p	1.3	2.42	1.26	2.04	2.87	5.09	0.16769	1	1.11305	up
conservative_NW_011876347.1_301167	dme-miR-5-5p	1.3	3.03	0	0.68	6.46	3.18	0.138873	1	1.30212	up
conservative_NW_011876358.1_321813	mmu-miR-7094-1-5p	1.3	1.21	0	1.36	4.31	1.27	0.126036	1	1.36627	up
unconservative_NW_011876328.1_266057	Bdo-novel-mir-39	1.3	0.61	0	1.36	5.39	0	0.130244	1	1.6709	up
conservative_NW_011876306.1_238010	bmo-miR-71-3p	1.04	0	0	1.36	0.72	1.91	0.293949	1	1.25964	up
unconservative_NW_011876352.1_310760	Bdo-novel-mir-42	1.04	1.21	1.26	4.76	6.1	3.18	0.00895512	1	2.18685	up
unconservative_NW_011876359.1_322955	Bdo-novel-mir-45	1.04	0	0	0	0.36	4.46	0.340615	1	1.55047	up
unconservative_NW_011876372.1_352953	Bdo-novel-mir-49	1.04	0.61	0	2.04	2.51	1.27	0.128874	1	1.51552	up
conservative_NW_011876058.1_118061	crm-miR-72-3p	0.78	0	0	1.36	1.8	5.73	0.0068835	1	2.68067	up
conservative_NW_011876400.1_466327	cel-miR-8207-3p	0.78	0	0	0	0.72	4.46	0.131206	1	1.96702	up
unconservative_NW_011876360.1_326254	Bdo-novel-mir-46	0.78	0	1.26	0.68	0.72	2.55	0.46323	1	1.03442	up
conservative_NW_011875560.1_65178	dps-miR-2550-5p	0.52	0	0	0	1.08	2.55	0.261932	1	1.97507	up
conservative_NW_011876364.1_332067	hsa-miR-548g-3p	0.52	0.61	0	1.36	0.72	1.27	0.371849	1	1.24268	up
unconservative_NW_011876398.1_449265	Bdo-novel-mir-59	0.52	0.61	0	0	2.51	0	0.625898	1	1.15192	up
conservative_NW_011873581.1_21531	cin-miR-183-3p	0.26	0.61	0	4.76	0.36	0.64	0.0768576	1	2.57224	up
conservative_NW_011875962.1_103568	pma-miR-4582	0.26	0	0	0.68	2.15	0.64	0.0507009	1	2.77079	up
conservative_NW_011876075.1_122839	gga-miR-6711-5p	0.26	0	0	0	0	1.91	0.407159	1	1.76352	up
conservative_NW_011876111.1_131541	bta-miR-6533	0.26	0	0	1.36	0	0	0.419279	1	1.53281	up
conservative_NW_011876139.1_140353	oan-miR-590-3p	0.26	0	0	0	1.44	0	0.388657	1	1.7584	up
conservative_NW_011876194.1_158690	hsa-miR-6756-5p	0.26	0.61	0	0	1.44	1.27	0.336416	1	1.52031	up
conservative_NW_011876222.1_171030	aga-miR-1891	0.26	0	0	0.68	0.36	1.91	0.118168	1	2.32862	up
conservative_NW_011876301.1_233724	bmo-miR-3422	0.26	0	1.26	1.36	1.08	0	0.603377	1	1.23316	up
conservative_NW_011876308.1_239720	tca-miR-3896-3p	0.26	0.61	0	0.68	2.51	0	0.197784	1	1.85425	up
conservative_NW_011876354.1_315596	ppc-miR-8340-5p	0.26	0	0	0	1.44	0.64	0.204254	1	2.10701	up
conservative_NW_011875304.1_52410	mmu-miR-7026-3p	0	0	0	0.68	0.72	0	0.332057	1	3.2606	up
conservative_NW_011876198.1_160822	hsa-miR-6085	0	0	0	0	1.8	0	0.304702	1	3.6338	up
conservative_NW_011876286.1_217385	ssa-miR-106a-3p	0	0	0	0	0	2.55	0.319064	1	3.75584	up
conservative_NW_011876346.1_299924	cin-miR-4143-3p	0	0	0	0.68	0.72	0	0.330767	1	3.2607	up
conservative_NW_011876380.1_378364	hsa-miR-1178-3p	0	0.61	0	2.04	0	0	0.592497	1	1.75938	up
conservative_NW_011876386.1_397021	hhi-miR-723	0	0	1.26	0	1.44	0	1	1	1.04976	up
unconservative_NW_011874899.1_39989	Bdo-novel-mir-6	0	1.82	0	1.36	2.15	0	0.546649	1	1.23406	up
unconservative_NW_011874955.1_41571	Bdo-novel-mir-7	0	0	0	4.08	0	0	0.132115	1	4.7421	up
unconservative_NW_011876352.1_311704	Bdo-novel-mir-43	0	1.82	0	0	0.36	4.46	0.494738	1	1.36472	up
unconservative_NW_011876361.1_328256	Bdo-novel-mir-47	0	0	1.26	0.68	0.72	3.18	0.249406	1	2.62891	up
unconservative_NW_011876386.1_396674	Bdo-novel-mir-52	0	0	0	0	2.15	0	0.300383	1	3.86424	up
conservative_NW_011876381.1_381063	cel-miR-2-3p	30.11	10.29	141.24	27.9	18.31	24.19	0.127217	1	-1.21046	down
conservative_NW_011875499.1_61931	sme-miR-76-5p	5.45	2.42	1.26	0.68	0.72	3.18	0.272414	1	-1.12777	down
conservative_NW_011874201.1_28013	gga-miR-199-3p	2.6	3.63	15.13	4.76	1.08	0	0.167707	1	-1.54019	down
conservative_NW_011874942.1_41141	dps-miR-2536-3p	2.08	0	1.26	0	0	0	0.125919	1	-4.2897	down
unconservative_NW_011876400.1_464203	Bdo-novel-mir-62	2.08	1.82	0	0	0	0.64	0.171332	1	-2.59142	down
conservative_NW_011869893.1_2118	cel-miR-358-3p	1.82	1.21	0	0	0.72	0	0.243379	1	-1.64635	down
conservative_NW_011876172.1_151459	rno-miR-664-1-5p	1.82	1.82	0	1.36	0	0	0.651214	1	-1.47718	down
conservative_NW_011874822.1_38138	gga-miR-1785	1.56	0.61	0	0	0.36	0.64	0.76006	1	-1.18429	down
conservative_NW_011876036.1_113841	cbr-miR-252	1.56	0	7.57	0	0	0.64	0.0468314	1	-3.43072	down
conservative_NW_011876394.1_426235	ppc-miR-8335-3p	1.56	1.21	0	0	0	1.27	0.588655	1	-1.31427	down
unconservative_NW_011874241.1_28418	Bdo-novel-mir-5	1.56	0	6.31	0.68	0.72	0.64	0.263609	1	-1.50457	down
unconservative_NW_011875986.1_105755	Bdo-novel-mir-15	1.56	1.21	0	0.68	0	0	0.351714	1	-2.05347	down
unconservative_NW_011876389.1_406158	Bdo-novel-mir-54	1.56	0.61	0	0	0	0.64	0.504533	1	-1.8797	down
conservative_NW_011876388.1_402482	bta-miR-2284l	1.3	0	0	0	0	0.64	0.723644	1	-1.32365	down
unconservative_NW_011876181.1_154018	Bdo-novel-mir-20	1.3	9.68	0	1.36	0	3.18	0.360927	1	-1.20214	down
conservative_NW_011875989.1_106248	mmu-miR-196a-2-3p	1.04	0	0	0	0	0	0.591896	1	-3.06172	down
conservative_NW_011876336.1_277944	mmu-miR-669n	1.04	0	0	0	0	0.64	1	1	-1.05313	down
conservative_NW_011875538.1_63967	gga-miR-1780	0.78	1.21	0	0	0	0	0.190946	1	-3.65863	down
conservative_NW_011875865.1_91625	hsa-miR-4778-5p	0.78	0	0	0	0	0	0.576231	1	-2.77305	down
conservative_NW_011875940.1_100350	hsa-miR-1261	0.78	1.21	0	0	0	0	0.187833	1	-3.66145	down
conservative_NW_011876310.1_242253	oan-miR-1421x-3p	0.78	2.42	1.26	0	1.08	0	0.307883	1	-1.34876	down
conservative_NW_011876390.1_409174	gga-miR-1579	0.78	0	0	0	0	0	0.573223	1	-2.77993	down
unconservative_NW_011876330.1_269137	Bdo-novel-mir-40	0.78	1.82	1.26	0.68	0	0	0.217616	1	-2.22917	down
conservative_NW_011875909.1_96112	dre-miR-19a-5p	0.52	1.21	0	0	0	0.64	0.682506	1	-1.41909	down
conservative_NW_011876327.1_263597	oan-miR-7415-5p	0.52	0.61	0	0	0	0	0.53842	1	-2.9976	down
conservative_NW_011876390.1_409980	bmo-miR-2737	0.52	0.61	1.26	0	0	0	0.175261	1	-3.52226	down
unconservative_NW_011873734.1_23020	Bdo-novel-mir-4	0.52	0	0	0	0	0	1	1	-2.35288	down
conservative_NW_011876162.1_147519	cel-miR-4805-3p	0.26	0.61	0	0	0	0	1	1	-2.56167	down
conservative_NW_011876237.1_181751	ppc-miR-8264-5p	0.26	0	0	0	0	0	1	1	-1.6718	down
conservative_NW_011876283.1_214973	dps-miR-968-3p	0.26	0	5.04	0	0	0	0.144339	1	-4.67437	down
conservative_NW_011876332.1_271541	hsa-miR-3937	0.26	1.21	2.52	0	0	0	0.0998148	1	-4.1514	down
conservative_NW_011876367.1_341456	hsa-miR-517a-3p	0.26	0.61	0	0	0	0	1	1	-2.56041	down
conservative_NW_011876378.1_370802	mmu-miR-881-3p	0.26	0	0	0	0	0	1	1	-1.66563	down
conservative_NW_011876394.1_424800	mmu-miR-6929-3p	0.26	0	1.26	0	0	0	0.56927	1	-2.76589	down
conservative_NW_011873003.1_17290	bta-miR-2399-5p	0	1.82	0	0	0	0	0.424453	1	-3.29856	down
conservative_NW_011876195.1_158917	mdo-miR-7264-3p	0	1.21	2.52	0	0.36	0.64	0.599281	1	-1.25585	down
conservative_NW_011876249.1_188359	dsi-miR-2584-5p	0	1.82	0	0	0	0	0.424432	1	-3.29856	down
conservative_NW_011876329.1_266949	dme-miR-310-5p	0	1.82	0	0	0	0	0.425277	1	-3.29861	down
conservative_NW_011876349.1_305159	cfa-miR-1840	0	1.21	0	0	0	0	0.595212	1	-2.77106	down
conservative_NW_011876355.1_316796	mmu-miR-380-3p	0	3.03	0	0	0.36	0.64	0.648529	1	-1.26224	down
conservative_NW_011876399.1_454975	mmu-miR-7210-5p	0	2.42	1.26	0	0	1.27	0.50177	1	-1.29804	down
unconservative_NW_011876262.1_198763	Bdo-novel-mir-26	0	1.21	0	0	0	0	0.5945	1	-2.77068	down
